# Supplementary material
Source: MDPI journal article supplement (https://www.mdpi.com/2079-9284/8/3/76)
Supplement: s1 [file s1]

# Exploring the Protective Effects of Phaeodactylum Tricornutum Extract on LPS-Treated Fibroblasts

Dimitra Mosxou 1,2, Sophia Letsiou 1,2\*

1. Laboratory of Biochemistry, Scientific Affairs Department, APIVITA SA, Industrial Park of Markopoulo Mesogaia, Industrial Park of Markopoulo Mesogaia, Markopoulo Attika, 19003, postcode Athens, Greece.

2. Department of Biotechnology, School of Food, Biotechnology and Development, Agricultural University of Athens, 11855, postcode Athens, Greece.

\* Correspondence: Correspondence: Letsiou-s@apivita.com, Laboratory of Biochemistry, Research and Development Department, APIVITA SA, Industrial Park of Markopoulo Mesogaia, 19003, Markopoulo Attika, Athens, Greece. letsiou-s@apivita.com, Tel: 0030 2102854428, Fax: +30 2102843580.

Table S1. Gene symbol, Primer pairs

| Gene symbol   | Primer R                       | Primer F                       |
|---------------|--------------------------------|--------------------------------|
| iNOS          | 5'- CTGCCGAGATTTGAGCCTCATG -3' | 5'- GCTCTACACCTCCAATGTGACC -3' |
| IL6           | 5'-TTCTGCCAGTGCCTCTTTGCTG-3'   | 5'-AGACAGCCACTCACCTCTTCAG-3'   |
| IL1B          | 5'-GTGCAGTTCAGTGATCGTACAGG-3'  | 5'-CCACAGACCTTCCAGGAGAATG-3'   |
| IL10          | 5'-TCAGACAAGGCTTGCAACCCA-3'    | 5'-TCTCCGAGATGCCTTCAGCAGA-3'   |
| TNF $\alpha$  | 5'-ATGGGCTACAGGCTTGTCACCTC-3'  | 5'-CTCTTCTGCCTGCTGCACTTTG-3'   |
| pikB $\alpha$ | 5'-GTCAGCTGCTTCCACATCAA-3'     | 5'-AGACAGCCACTCACCTCTTCAG-3'   |
| NFkB          | 5- CAGCAGAAAGCTCACCACACTC -3'  | 5'- GGCAGACCAGTGTGATTGAGCA -3' |
| GPX1          | 5'- CTCGAAGAGCATGAAGTTGGGC -3' | 5'- GTGCTCGGCTTCCCGTGCAAC -3'  |

Table S2. Relative gene expression levels per experimental group.

|                 | Relative Gene expression of the different treatment groups |                  |                 |                       |        |
|-----------------|------------------------------------------------------------|------------------|-----------------|-----------------------|--------|
| Gene            | control                                                    | HRF-PT treatment | LPS treatment   | HRF-PT /LPS treatment | Pvalue |
| iNOS            | 1.00 $\pm$ 0.07                                            | 0.75 $\pm$ 0.05  | 1.59 $\pm$ 0.24 | 0.40 $\pm$ 0.09       | p<0.05 |
| IL6             | 1.03 $\pm$ 0.17                                            | 0.85 $\pm$ 0.05  | 1.92 $\pm$ 0.24 | 0.42 $\pm$ 0.07       | p<0.05 |
| IL1B            | 1.05 $\pm$ 0.24                                            | 0.75 $\pm$ 0.02  | 1.55 $\pm$ 0.21 | 0.38 $\pm$ 0.09       | p<0.05 |
| IL10            | 1.09 $\pm$ 0.32                                            | 0.65 $\pm$ 0.05  | 1.61 $\pm$ 0.24 | 0.41 $\pm$ 0.09       | p<0.05 |
| TNF $\alpha$    | 1.00 $\pm$ 0. 01                                           | 0.72 $\pm$ 0.05  | 1.50 $\pm$ 0.24 | 0.38 $\pm$ 0.09       | p<0.05 |
| pikB $\alpha$ , | 1.17 $\pm$ 0.41                                            | 0.75 $\pm$ 0.05  | 1.59 $\pm$ 0.24 | 0.40 $\pm$ 0.09       | p<0.05 |
| NFkB,           | 1.02 $\pm$ 0.15                                            | 0.73 $\pm$ 0.05  | 1.57 $\pm$ 0.24 | 0.40 $\pm$ 0.09       | p<0.05 |
| GPX1            | 1.05 $\pm$ 0.37                                            | 1.15 $\pm$ 0.09  | 0.75 $\pm$ 0.24 | 1.50 $\pm$ 0.19       | p<0.05 |
